# Supplementary material
Source: Research Square preprint supplement (doi:10.21203/rs.3.rs-9625796/v1)
Supplement: Supplementary file 1 [file de5a57af4fd904bfd67397d3.docx]

**APPENDIX A**

# Appendix A: Phase 1 Grounded Theory — Coding Structure and Construct Development

Table A1 presents the complete Grounded Theory coding structure generated from 20 interviews (NVivo 14). Open coding produced 214 substantive codes, which axial coding consolidated into 28 categories and 11 sub-categories, integrated through selective coding around the core category: Resourceful Platform Engagement as a Frugal Survival Strategy. The table maps each theoretical category to its GT sub-dimensions, illustrative codes, representative evidence, and the construct it informs.

Table A1. Grounded Theory Coding Structure, Theoretical Categories, and Construct Links

| Core Category | GT Category | Sub-Dimension | Illustrative Codes | Construct |
| --- | --- | --- | --- | --- |
| Resourceful PlatformEngagement as aFrugal SurvivalStrategy | 1. Platform Participation | E-commerce as market enablerFinTech as financial enablerSupply chain integration | "Platforms allowed us to reach customers we could not access before.""Digital payments reduced delays and improved cash flow.""We use platforms to manage suppliers and deliveries." | ECPPFTPPDSPP |
|  | 2. Frugal CapabilityDevelopment | Low-cost tool utilisationWorkflow adaptationMarket capability building | "We use platform analytics instead of buying software.""We adapted platform tools to manage production efficiently.""Platforms help us understand customer preferences." | FOCFOCFMC |
|  | 3. InstitutionalFriction | Regulatory uncertaintyInfrastructure gapsWeak enforcement | "Regulations change frequently and disrupt operations.""Electricity issues affect our digital operations.""There is no proper system for resolving disputes." | IVIVIV |
|  | 4. SustainabilityOutcomes | Economic outcomesSocial outcomesEnvironmental outcomes | "Our sales increased after joining platforms.""We hired more workers due to increased demand.""Digital systems reduced paper usage." | ECSSCSENS |

Note. GT = Grounded Theory. 214 open codes → 28 axial categories → 11 sub-categories → 1 core category. Theoretical saturation confirmed at interview 18; interviews 19–20 conducted to verify without generating new categories. Inter-rater reliability: Cohen's κ = 0.81 (Landis & Koch, 1977). Trustworthiness: member checking (n = 6); peer debriefing (independent researcher); audit trail maintained in NVivo 14 (Lincoln & Guba, 1985). The 14 GT-derived items generated from this coding structure are identified in Appendix B (column: Item Source).

**APPENDIX B**

# Appendix B: Measurement Instrument — Scale Items, Theoretical Grounding, and Reliability

Table B1 presents all 45 scale items across nine reflective constructs (5 items each), measured on a five-point Likert scale (1 = Strongly Disagree; 5 = Strongly Agree). Items adapted from the prior literature were modified for the Pakistan manufacturing platform context and verified through back-translation. Items marked 'GT-derived' were generated inductively from Phase 1 Grounded Theory coding (Appendix A) and validated through expert panel review (3 academics; 2 SME practitioners), cognitive interviewing, and pilot testing (n = 30; all item-to-total correlations ≥ 0.40). Table B2 presents reliability and validity statistics for all constructs.

Table B1. Complete Measurement Instrument — All Constructs and Scale Items

| Construct | Code | Scale Item (1 = Strongly Disagree → 5 = Strongly Agree) | Source |
| --- | --- | --- | --- |
| ECPP | ECPP1 | Our firm actively uses e-commerce platforms (e.g., Daraz, Amazon, Shopify) to sell manufactured products to national and international customers. | Ahmed et al. (2022) |
|  | ECPP2 | E-commerce platform participation generates a significant proportion of our firm's total business revenue. | Wang & Zhang (2025) |
|  | ECPP3 | We leverage free seller analytics and dashboard tools to understand customer preferences and monitor market trends. | *GT-derived* |
|  | ECPP4 | Platform participation has enabled our firm to access new geographic markets previously beyond our reach. | *GT-derived* |
|  | ECPP5 | We exploit platform-provided logistics integrations, promotional tools, and seller training to improve operational and market performance. | Yadav et al. (2025) |
| FTPP | FTPP1 | Our firm uses digital payment platforms (e.g., JazzCash, EasyPaisa, online banking) for financial transactions with customers and suppliers. | Siddik et al. (2023) |
|  | FTPP2 | We use FinTech platforms to access business financing, working capital, or credit facilities for manufacturing operations. | Waqar et al. (2025) |
|  | FTPP3 | Our firm uses green finance platforms or sustainability-linked financial tools to fund eco-efficient manufacturing practices. | Rashid et al. (2025) |
|  | FTPP4 | FinTech platform participation has improved the speed, cost efficiency, and reliability of our financial management processes. | *GT-derived* |
|  | FTPP5 | We use digital financial platforms to manage payments and reach buyers who prefer digital payment channels. | *GT-derived* |
| DSPP | DSPP1 | Our firm uses digital supply chain platforms or B2B procurement systems to coordinate with suppliers and manage procurement. | Chari et al. (2023) |
|  | DSPP2 | We participate in digital supply chain platforms providing real-time visibility into inventory levels, order status, and logistics. | Khan & Emon (2025) |
|  | DSPP3 | Digital supply chain platform participation has reduced procurement costs, minimised lead times, and improved responsiveness. | Awuah-Gyawu et al. (2025) |
|  | DSPP4 | We use digital supply chain platforms to connect with sustainability-certified suppliers requiring transparent supply chain practices. | Sègbotangni et al. (2025) |
|  | DSPP5 | Platform participation has allowed our firm to optimise production scheduling, reduce inventory waste, and improve distribution efficiency. | *GT-derived* |
| FOC | FOC1 | Our firm uses free or low-cost platform tools to digitise manufacturing operations without large capital investment in proprietary systems. | *GT-derived; Ahuja & Chan (2016)* |
|  | FOC2 | We have developed lean digital workflows by resourcefully exploiting platform features — analytics, tracking, scheduling. | *GT-derived; Rossit & Bidanda (2026)* |
|  | FOC3 | Our firm uses platform-based automation to improve production scheduling, inventory management, and logistics at low cost. | *GT-derived; Ozbiltekin-Pala & Ozkan-Ozen (2025)* |
|  | FOC4 | We continuously adapt platform tools to our manufacturing needs, improving efficiency without proportionate cost increases. | *GT-derived* |
|  | FOC5 | Our digital operational capabilities have been built through resourceful use of platform infrastructure rather than expensive enterprise software. | *GT-derived; Lan & Wang (2023)* |
| FMC | FMC1 | Our firm uses low-cost, platform-provided seller tools to access new customer segments and expand market reach beyond our local region. | *GT-derived; Sengura et al. (2024)* |
|  | FMC2 | We leverage free platform analytics and market intelligence tools to understand customer needs and identify market opportunities. | *GT-derived; Khattak (2022)* |
|  | FMC3 | Our digital market access capabilities have been built through platform communication features, digital storefronts, and buyer directories. | *GT-derived* |
|  | FMC4 | Platform participation has enabled our firm to build customer relationships and diversify sales channels at comparatively low cost. | *GT-derived; Wang & Zhang (2025)* |
|  | FMC5 | We use platform ecosystems to access green-certified buyers and export market partners who require environmental product standards. | *GT-derived; Rashid et al. (2025)* |
| IV | IV1 | The regulatory environment governing digital business in our market is unpredictable and subject to frequent, disruptive policy changes. | *Akbar et al. (2017); GT-derived* |
|  | IV2 | Weak contract enforcement makes platform-based business transactions and digital agreements risky for our firm. | *Yan & Ahmad (2025); GT-derived* |
|  | IV3 | Inadequate governance of digital payment systems and unstable infrastructure constrain the reliability of our platform operations. | *Succurro & Donati (2025); GT-derived* |
|  | IV4 | Fragmented government policies on digital business and technology standards limit our firm's ability to leverage platform ecosystems strategically. | Kovid et al. (2025) |
|  | IV5 | Market information asymmetries and absent credible verification systems make it difficult to establish trust through digital platforms. | Saha et al. (2023) |
| ECS | ECS1 | Our firm has achieved measurable revenue growth as a result of digital platform participation and the capabilities developed through it. | Cuevas-Vargas et al. (2022) |
|  | ECS2 | Our operational costs have decreased through digitising production and supply chain processes via platform-provided tools. | Buhaya & Metwally (2024) |
|  | ECS3 | Digital platform participation has improved our firm's long-term financial resilience through market disruptions. | Jamwal et al. (2025) |
|  | ECS4 | Our productivity and competitive position have improved through the digital capabilities built via platform participation. | Ahmed et al. (2022) |
|  | ECS5 | Our firm has achieved sustainable economic growth — balancing profitability with long-term viability — through platform ecosystems. | Cuevas-Vargas et al. (2022) |
| SCS | SCS1 | Platform participation and revenue growth have enabled our firm to create additional employment opportunities for community workers. | Khan (2025) |
|  | SCS2 | Digital platform tools have contributed to improvements in working conditions, workplace safety, and labour standards compliance. | Ali & Johl (2023) |
|  | SCS3 | Our platform activities have improved the ability of women and marginalised workers to participate through digital and flexible work arrangements. | Rizvi et al. (2024) |
|  | SCS4 | Participation in digital platform ecosystems has improved the quality, fairness, and formality of employment practices in our firm. | Liu et al. (2025) |
|  | SCS5 | Our digital market activities have contributed positively to the economic well-being and social inclusion of our surrounding community. | Khan (2025) |
| ENS | ENS1 | Digital platform tools have helped our firm reduce material waste, improve resource utilisation, and enhance process efficiency. | Khan et al. (2025) |
|  | ENS2 | Platform participation has contributed to reductions in our firm's energy consumption and carbon emissions through lean digital operations. | Mehmood et al. (2025) |
|  | ENS3 | We use platform-based digital monitoring tools to track, report, and manage our firm's environmental performance in real time. | Buhaya & Metwally (2024) |
|  | ENS4 | Digital supply chain platform participation has enabled greener procurement, sustainability-certified sourcing, and reduced logistics environmental impact. | Sègbotangni et al. (2025) |
|  | ENS5 | Connection to sustainability-demanding buyers through platform market access has motivated our firm to improve its environmental practices. | Wang & Zhang (2025); Dung & Binh (2026) |

Note. GT-derived = item generated inductively from Phase 1 Grounded Theory coding (see Appendix A) and grounded in the theoretical reference noted. Adapted = item modified from the cited source for the Pakistan manufacturing platform context. FOC and FMC items constitute novel scales with all five items GT-derived. Items DSPP4 and ENS4 are adapted from Sègbotangni et al. (2025), which is included in the paper reference list as a source for the DSPP construct (Table 5).

Table B2. Construct Reliability and Validity Summary (n = 382)

| Construct | Code | Items | α | CR | AVE | Threshold |
| --- | --- | --- | --- | --- | --- | --- |
| E-Commerce Platform Participation | ECPP | 5 | 0.871 | 0.903 | 0.652 |  |
| FinTech Platform Participation | FTPP | 5 | 0.863 | 0.898 | 0.638 |  |
| Digital Supply Chain Platform Participation | DSPP | 5 | 0.857 | 0.894 | 0.631 |  |
| Frugal Operational Capability | FOC | 5 | 0.878 | 0.910 | 0.671 |  |
| Frugal Market Capability | FMC | 5 | 0.869 | 0.903 | 0.657 |  |
| Institutional Voids | IV | 5 | 0.856 | 0.893 | 0.627 |  |
| Economic Sustainability | ECS | 5 | 0.874 | 0.907 | 0.663 |  |
| Social Sustainability | SCS | 5 | 0.861 | 0.897 | 0.635 |  |
| Environmental Sustainability | ENS | 5 | 0.876 | 0.908 | 0.666 |  |
| Recommended threshold | — | — | ≥ 0.70 | ≥ 0.70 | ≥ 0.50 | Hair et al. (2019) |

Note. α = Cronbach's alpha; CR = Composite Reliability; AVE = Average Variance Extracted. All indicator loadings ≥ 0.776. HTMT values for all construct pairs < 0.85 (max = 0.723, DSPP–FTPP), confirming discriminant validity (Henseler et al., 2015). Harman's single-factor test: 28.3% of variance (< 50% threshold), confirming acceptable common method variance (Podsakoff et al., 2003). VIF range: 1.23–2.87 (< 3.3 threshold; Hair et al., 2019). Control variables (firm size, firm age, owner education, prior digital experience) generated no significant paths to sustainability outcomes.
